# Supplementary material for: Magnetism at the interface of non-magnetic Cu and C60
Source: Royal Society of Chemistry journal article supplement (doi:10.1039/d0cp06326f), 2021-01-01
Supplement: d0cp06326f1.pdf [file d0cp06326f1.pdf]

## Supplementary Information

### Magnetism at the interface of non-magnetic Cu and C<sub>60</sub>

Purbasha Sharangi,<sup>1</sup> Pierluigi Gargiani,<sup>2</sup> Manuel Valvidares,<sup>2</sup> and Subhankar Bedanta<sup>1, a)</sup>

<sup>1</sup>Laboratory for Nanomagnetism and Magnetic Materials (LNMM), School of Physical Sciences,  
National Institute of Science Education and Research (NISER), HBNI, P.O.- Jatni, 752050,  
India

<sup>2</sup>Alba Synchrotron Light Source, E-08290 Barcelona, Spain

We have performed X-ray reflectivity (XRR) to quantify the interdiffusion of Cu/C<sub>60</sub> and C<sub>60</sub>/Cu. Figure S1 shows the XRR data and its best fit for the sample S2. We have fitted the XRR data using GneX software. From XRR fit we have seen that interdiffusion is present at both the Cu and C<sub>60</sub> interfaces. The thickness of the interdiffused layer are 0.58 and 0.53nm for the Cu/C<sub>60</sub> and C<sub>60</sub>/Cu interfaces.

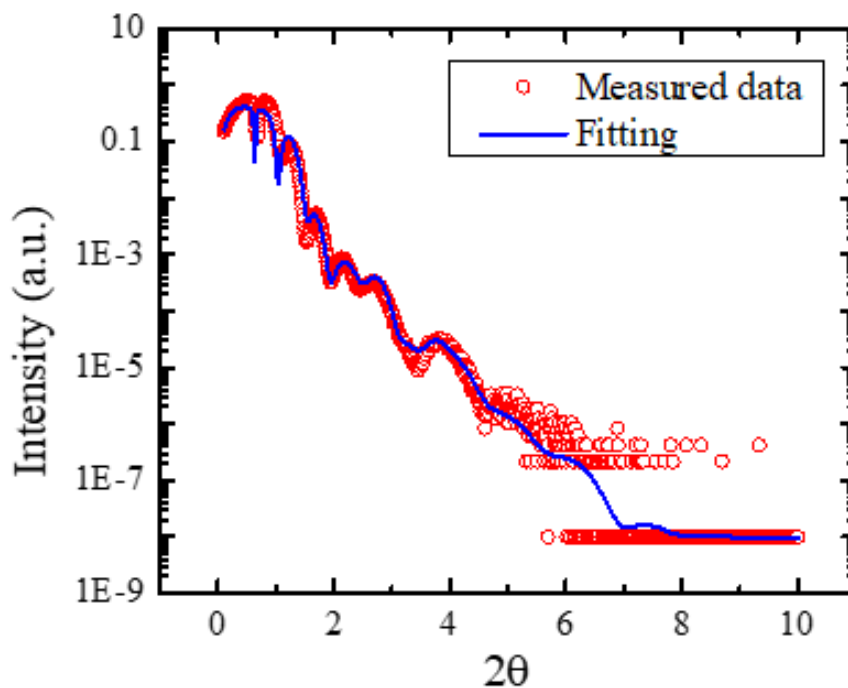

FIG. 1. XRR fit for sample S2. The red open circles are experimental and the blue solid line represents the fitting using GenX software.

Figure S2 (a-c) show the X-ray absorption spectra (XAS) and X-ray magnetic circular dichroism (XMCD) spectra for sample S3 at 6 T, -6 T and 0 T, respectively.

We have performed the sum rule analysis of XMCD data for sample S2 at 6 T. Figure S3 shows the XAS and XMCD spectra and their integration for sample S2. The calculated magnetic moment for Cu is 0.0071  $\mu_B$ /atom.

<sup>a)</sup>Electronic mail: [sbedanta@niser.ac.in](mailto:sbedanta@niser.ac.in)

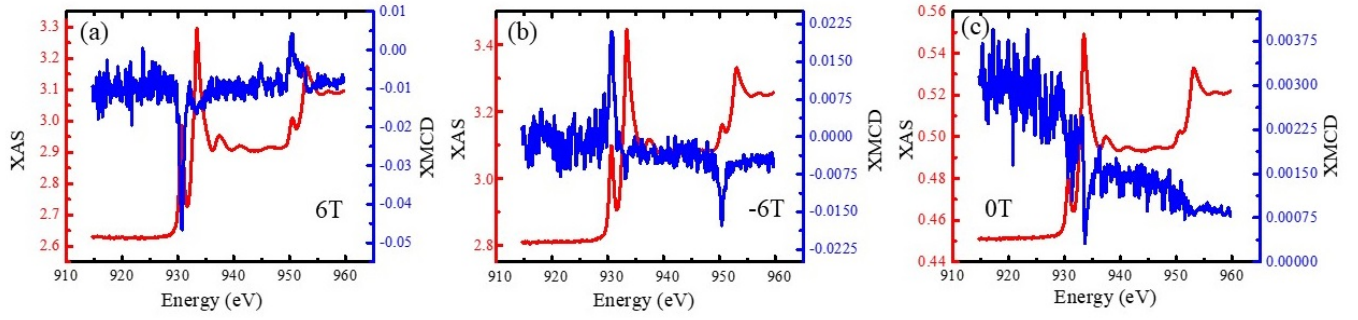

FIG. 2. XAS and XMCD spectra of the sample S3 measured at (a) 6 T, (b) -6 T and (c) 0 T magnetic field at Cu  $L_{2,3}$  edges. All the measurements were performed at 1.7 K.

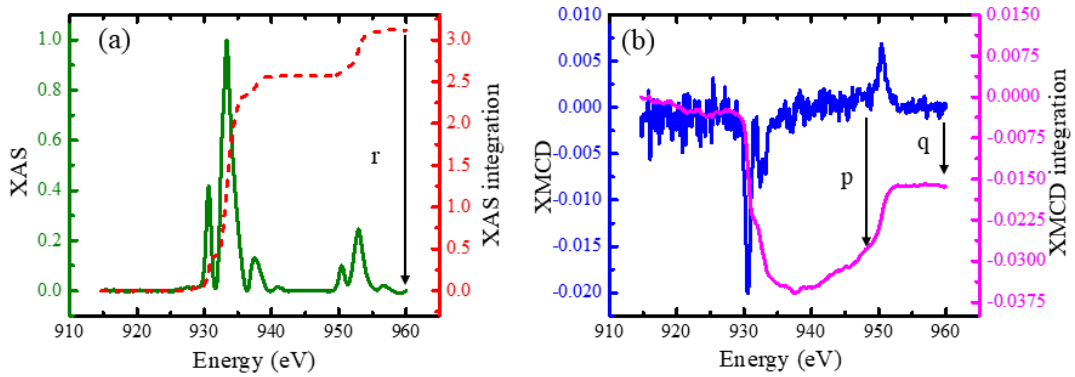

FIG. 3. Cu  $L_{2,3}$  XAS (a) and XMCD (b) spectra and their integrations calculated from the spectra are shown for the sample S2 at 6 T. The red dotted line is the integral of the XAS after subtracting two-step-like function from XAS spectra. The green solid line represents the spectra after subtracting a two-step function from XAS spectra. The p, q and r are the three integrals needed in the sum-rule analysis.
